# Supplementary material for: Modelling Anti-Ov16 IgG4 Antibody Prevalence as an Indicator for Evaluation and Decision Making in Onchocerciasis Elimination Programmes
Source: PubMed Central journal article supplement (PMC5289624; doi:10.1371/journal.pntd.0005314), 2017-01-23
Supplement: pntd.0005314.s002.pdf [file pntd.0005314.s002.pdf]

Prevalence of skin microfilariae (%)

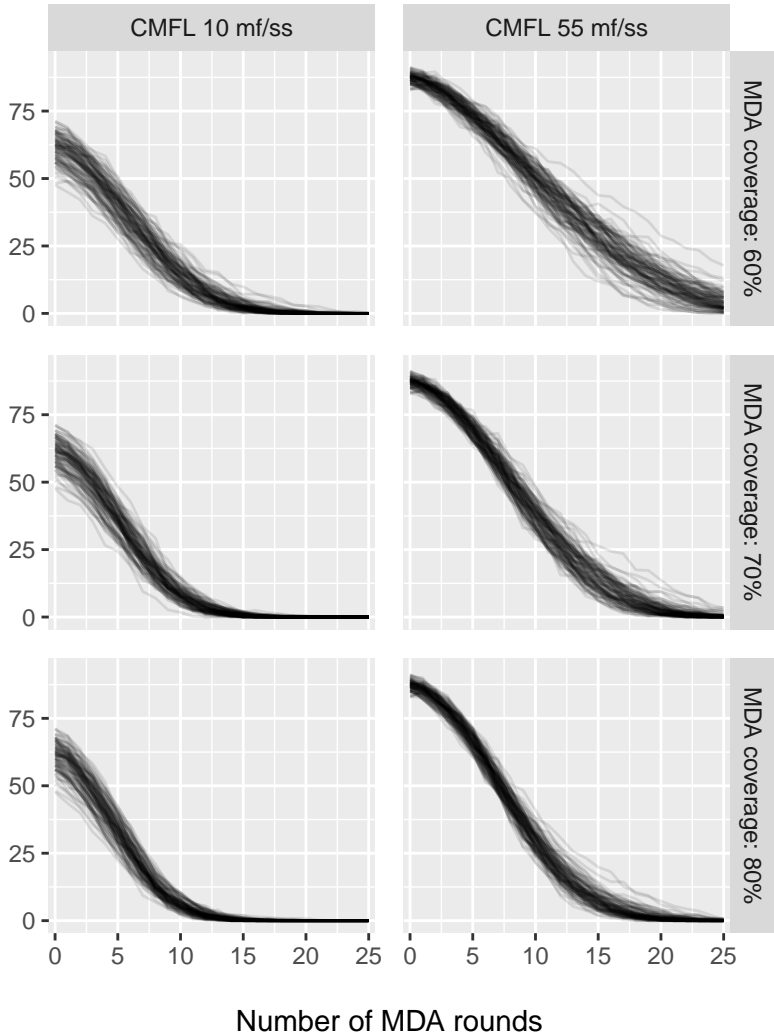

Number of MDA rounds

Prevalence of skin microfilariae (%)

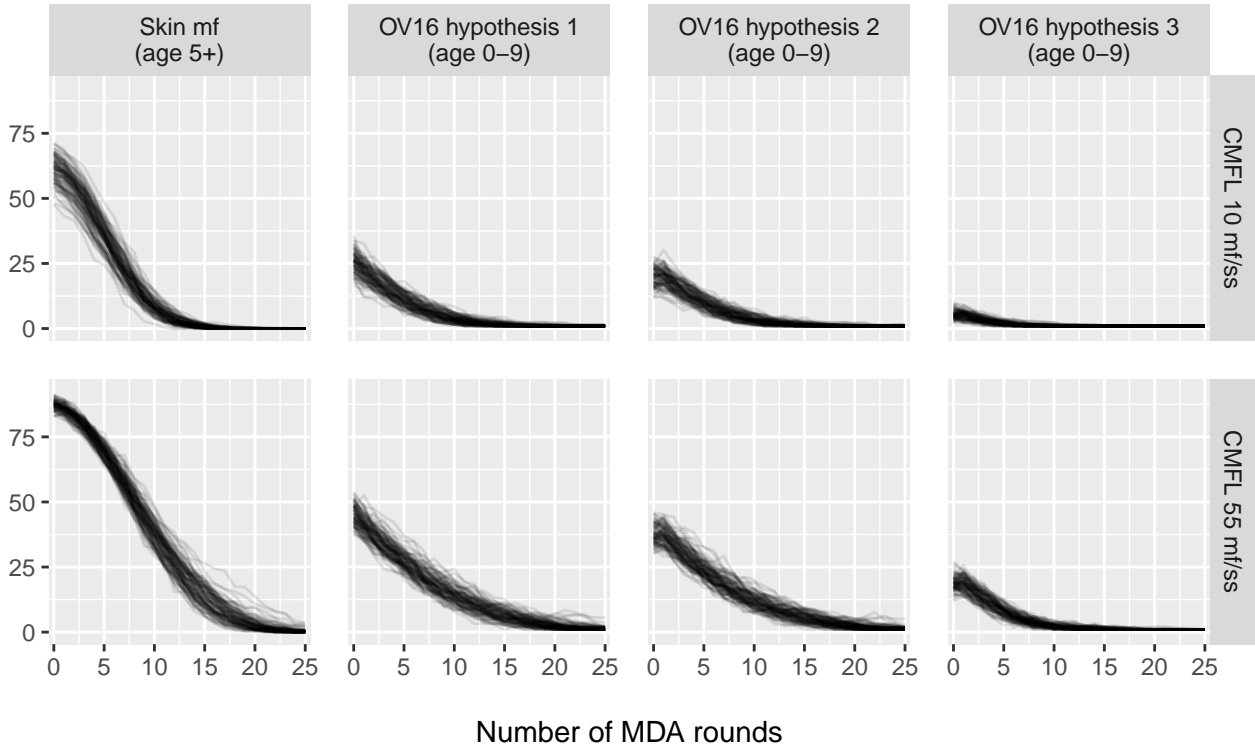

Number of MDA rounds
